# Supplementary material
Source: PubMed Central journal article supplement (PMC7876891)
Supplement: advancesADV2020003693-suppl1.pdf [file advancesADV2020003693-suppl1.pdf]

## Supplemental Materials

**Table 1. Antibodies**

| Antigen         | Fluorophore | Clone        | Company        |
|-----------------|-------------|--------------|----------------|
| CD3             | PE          | 17A2         | BioLegend      |
| CD3             | PerCP-Cy5.5 | 145-2C11     | eBioscience    |
| B220            | PE          | RA3-6B2      | BD Biosciences |
| Ly6C/Ly6G (Gr1) | PE          | RB6-8C5      | BD Biosciences |
| Ly6C/Ly6G (Gr1) | APC-Cy7     | RB6-8C5      | BD Biosciences |
| Ter119          | PE          | TER-119      | BD Biosciences |
| Ter119          | BV421       | TER-119      | BD Biosciences |
| CD11b           | PE          | M1/70        | eBioscience    |
| CD11b           | BV605       | M1/70        | BioLegend      |
| CD48            | AF700       | HM48-1       | BioLegend      |
| NK1.1           | AF700       | PK136        | BioLegend      |
| Sca1            | PE-Cy7      | D7           | eBioscience    |
| CD150           | BV605       | TC15-12F12.2 | BioLegend      |
| CD117 (c-Kit)   | BV421       | 2B8          | BD Biosciences |
| CD117 (c-Kit)   | APC         | 2B8          | BD Biosciences |
| CD31            | BV605       | 390          | BioLegend      |
| CD41            | eFluor450   | MWReg30      | eBioscience    |
| CD45            | AF700       | 30-F11       | BioLegend      |
| CD16/32         | PE          | 93           | eBioscience    |
| CD4             | AF700       | GK1.5        | eBioscience    |
| CD8             | PE-Cy5      | 53-6.7       | BioLegend      |
| CD19            | BV650       | 6D5          | BioLegend      |
| CD45.1          | APC         | A20          | BD Biosciences |
| CD45.2          | PE          | 104          | BD Biosciences |

**Table 2. Primers and g-RNAs**

| <b>Genotyping</b>                | <b>Forward 5' – 3'</b>         | <b>Reverse 5'- 3'</b>        |
|----------------------------------|--------------------------------|------------------------------|
| <i>VEC-Cre</i>                   | CCCAGGCTGACC<br>AAGCTGAG       | GCCTGGCGATCC<br>CTGAACATG    |
| <i>Vav-Cre</i>                   | GCGACAGTTAC<br>AGTCACAGAAGAGG  | GCCTGGCGATCC<br>CTGAACATG    |
| <i>Gpr56<sup>fl/fl</sup></i>     | TGGTAGCTAACCTAC<br>TCCAGGAGC   | CACGAGACTAGTGA<br>GACGTGCTAC |
| <i>Gpr56<sup>WT</sup></i>        | TGGTAGCTAACCTAC<br>TCCAGGAGC   | GGTGACTTTGGTGT<br>TCTGCACGAC |
| <b>Cre recombination</b>         |                                |                              |
| <i>Gpr56</i>                     | GTGAGGTCCAGGCA<br>TACTCG       | AGGAGCTCTGTGCA<br>TTGGAG     |
| <b>qRT-PCR</b>                   |                                |                              |
| <i>β-actin</i>                   | CACCACACCTTCTTA<br>CAATGAG     | GTCTCAAACATGAT<br>CTGGGTC    |
| <i>Gpr56</i>                     | TCTGCTCTGGCTTGT<br>CTTC        | AGGTTTATGTGGAC<br>TTTGATG    |
| <i>Gpr97</i>                     | CTGGGATATGGCTAA<br>AGGAGAC     | AAGGCGAAGAAGG<br>TCAAGTG     |
| <b>gRNAs</b>                     |                                |                              |
| <i>Gpr56</i> top                 | CACCGtctgttggtctggtt<br>ccgc   |                              |
| <i>Gpr56</i> bottom              | AAACgcggaaccagaccc<br>aacagaC  |                              |
| <i>Gpr97-ex2-top</i>             | CACCGgaatgtctgccgtc<br>ggcttc  |                              |
| <i>Gpr97-ex2-bottom</i>          | AAACgaagccgacgg cag<br>acattcC |                              |
| <i>Gpr97-ex10-top</i>            | CACCGcgggttctcctggtcgc<br>gaa  |                              |
| <i>Gpr97-ex10-bottom</i>         | AAACttcgcgaccaggaga<br>accgc   |                              |
| <b>Zebrafish mRNA generation</b> |                                |                              |
| <i>gpr56</i> coding zf           | ATGAACCAGAATCCA<br>GCAAAG      | TTAACACTTCTCGTT<br>AGTTTGTA  |
| <b>Mouse mRNA generation</b>     |                                |                              |
| <i>gpr56</i> cDNA                | TAGGAGTATAATGGC<br>TGTCCA      | CTTAGATGCGGCTG<br>GAGGA      |
| <i>gpr97</i> cDNA                | CTGATGGCGACAGC<br>CAGGA        | CTGCAGCCACCCAT<br>CATCA      |
| <i>gpr114</i> cDNA               | AATACTGGCGAGGAC<br>ATGGA       | GAGCTGGGTCACT<br>GTGTCAT     |
| <b>MO sequences</b>              |                                |                              |
| <i>gpr56</i> Spl E2 I2-3         | TGTAATGCTCGTTTA<br>CTTACCTTGA  |                              |

## Supplemental Figures and Legends

Figure S1

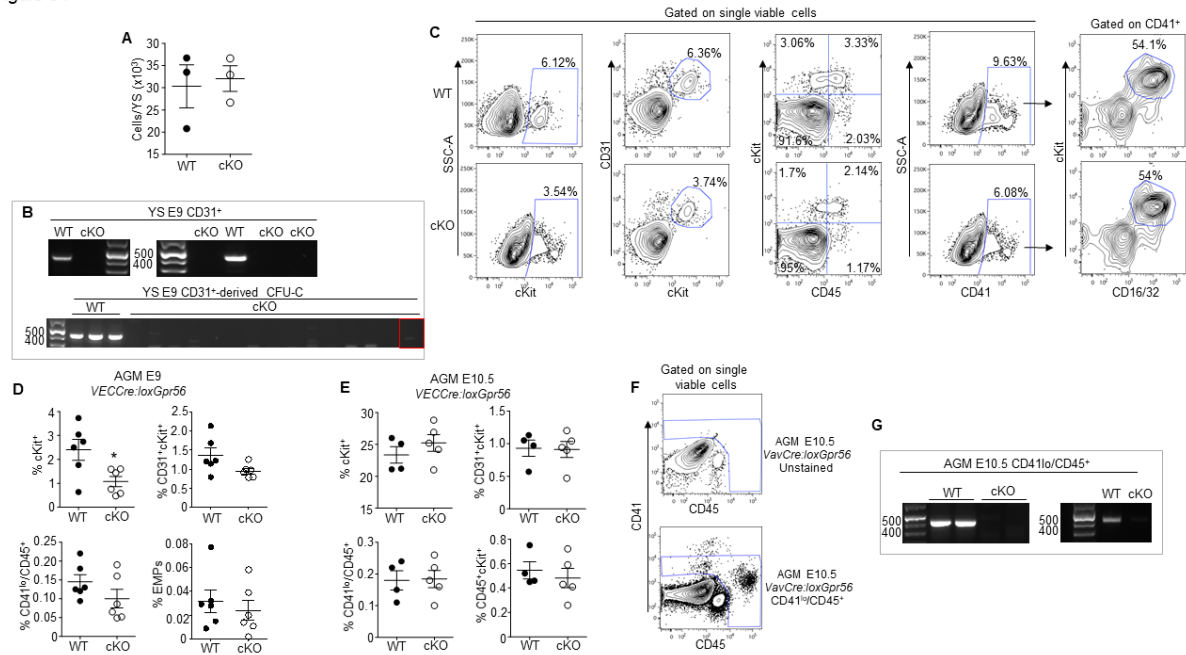

**Figure S1. Gating strategy for progenitor analysis and *Gpr56* deletion in YS and AGM.**

**A)** Number of cells in WT and *VECCre:loxGpr56* cKO E9 YS. WT=black; cKO=white. **B)** DNA PCR showing the deletion of *Gpr56* in sorted CD31<sup>+</sup> WT control and *VECCre:loxGpr56* cKO E9 YS cells (top panel) and in WT and *VECCre:loxGpr56* E9 YS CD31-derived CFU-C (bottom panel). WT band=460bp. **C)** Contour plots showing the gating strategy for the progenitor analyses in Fig 1D and Fig 1H. One WT and one E9 YS *VECCre:loxGpr56* are shown as representative examples. **D)** Percentages of cKit<sup>+</sup>, CD31<sup>+</sup>cKit<sup>+</sup>, CD41<sup>lo</sup>/CD45<sup>+</sup> and CD41<sup>+</sup>cKit<sup>+</sup>CD16/32<sup>+</sup> (EMP=erythromyeloid progenitor) cells in WT (black) and cKO (white) E9 AGM (n=6). **E)** Percentages of cKit<sup>+</sup>, CD31<sup>+</sup>cKit<sup>+</sup>, CD41<sup>lo</sup>/CD45<sup>+</sup> and CD45<sup>+</sup>cKit<sup>+</sup> cells in WT (black) and cKO (white) E9 AGM (WT n=4, cKO n=5). **F)** Contour plots showing the gating strategy for the cell sorting of CD41<sup>lo</sup>/CD45<sup>+</sup> from E10.5 *VavCre:loxGpr56* AGM. **G)** DNA PCR showing the deletion of *Gpr56* in sorted CD41<sup>lo</sup>/CD45<sup>+</sup> WT control and *VavCre:loxGpr56* cKO cells from E10.5 AGM. WT band=460bp.

Figure S2

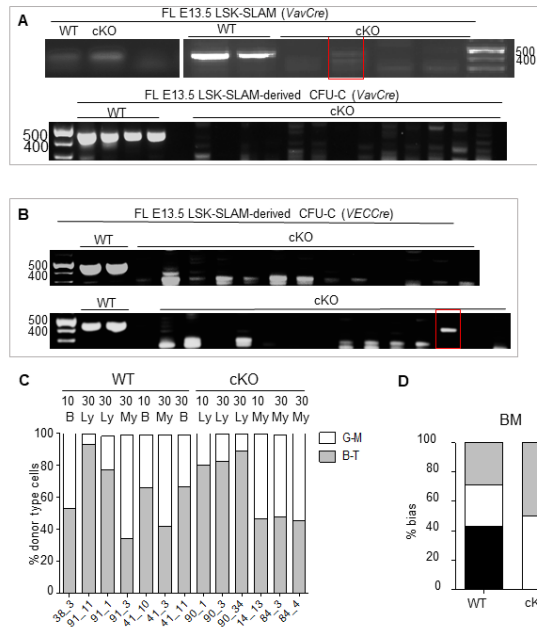

**Figure S2. *Gpr56* is deleted upon Cre activation in E13.5 FL and influences HSC lineage bias.**

**A)** DNA PCR showing the deletion of *Gpr56* in sorted LSK-SLAM cells from WT and *VavCre:loxGpr56* cKO E13.5 FL (top panel) and in LSK SLAM *VavCre:loxGpr56* FL-derived CFU-C (bottom panel). WT band=460bp. **B)** DNA PCR showing the deletion of *Gpr56* in sorted LSK-SLAM cells from E13.5 *VECCre:loxGpr56* FL-derived CFU-C. WT band=460bp. **C)** Percentage of lymphoid and myeloid cell contribution in BM of 13 individual adult irradiated recipient mice as measured by flow cytometry at 23 weeks post-injection of 10 and 30 LSK-SLAM WT control and *VavCre:loxGpr56* cKO E13.5 FL cells. **D)** Percentages of lymphoid-biased, balanced and myeloid-biased HSC engrafted recipients from panel C.

Figure S3

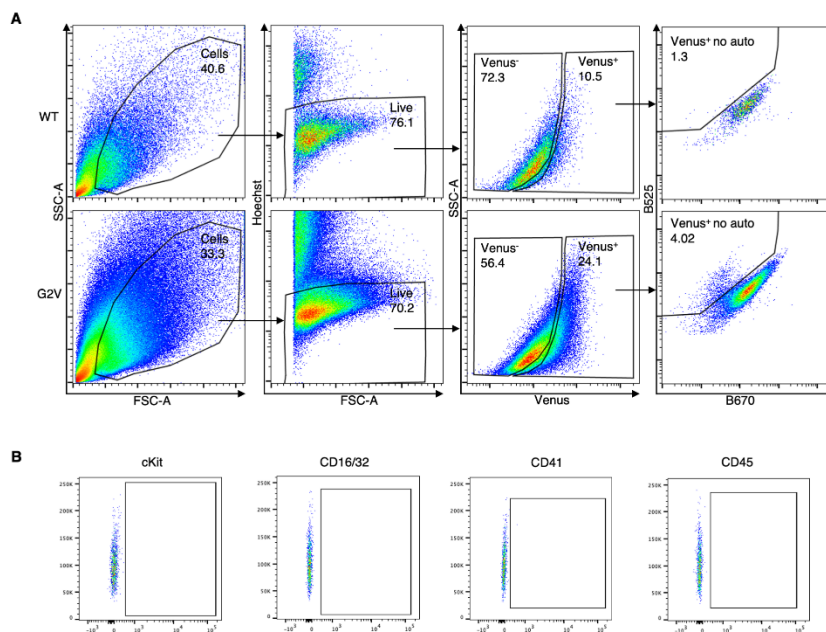

**Figure S3. Gating strategy for flow cytometry of WT and G2V ESC differentiation cultures.** Forward scatter (FSC), side scatter (SSC), Venus, and Venus minus autofluorescence plots are shown in upper panels. After gating on live cells, the Venus<sup>+</sup> cells are plotted against a dump neighbor channel (B525-Venus vs B670) to exclude auto-fluorescent cells. Only the cells positive in the B525 channel and not in the B670 channel are considered Venus<sup>+</sup>. WT cells are used as control to set the gates. Fluorescent minus one (FMO) controls for cKit, CD16/32, CD41, CD45 antibodies in lower panels.

Figure S4

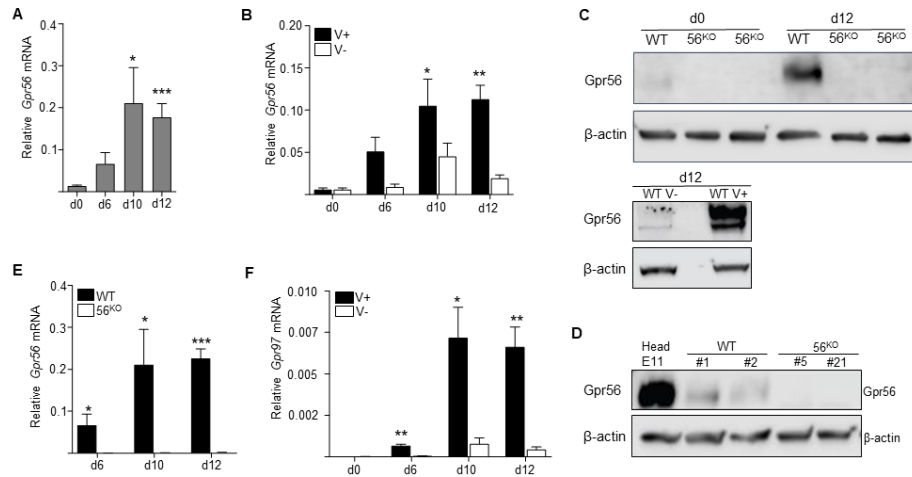

**Figure S4. Gpr56 and Gpr97 are expressed in mouse G2V.WT differentiated cells.**

Time course qRT-PCR analysis of relative *Gpr56* expression (normalized to *β-actin*) **A**) in unsorted and **B**) in Venus sorted G2V ESC hematopoietic differentiation cultures. **C**) Western blot analysis of Gpr56 protein expression in day 0 and day12 unsorted G2V (WT) and G2V *Gpr56* deleted (*Gpr56*<sup>KO</sup>) ESC hematopoietic differentiation cultures (upper panel) and day 12 Venus sorted G2V ESC (WT V<sup>+</sup> and WT V<sup>-</sup>) hematopoietic differentiation cultures (lower panel), with *β-actin* as protein normalization control. **D**) Western blot analysis of Gpr56 protein expression in day 0 G2V.WT (clones #1 and #2) and G2V.56KO (clones #5 and #21) ESCs, with *β-actin* as protein normalization control. Mouse embryonic head used as positive control. **E**) Time course qRT-PCR analysis of relative *Gpr56* expression (normalized to *β-actin*) in unsorted G2V.WT and G2V.56KO (clone #5) ESC hematopoietic differentiation cultures. **F**) Time course RT-qPCR analysis of relative *Gpr97* expression (normalized to *β-actin*) in G2V.WT Venus sorted cells. d=day of culture harvest; \*p<0.05; \*\*p<0.01; \*\*\*p<0.001.

Figure S5

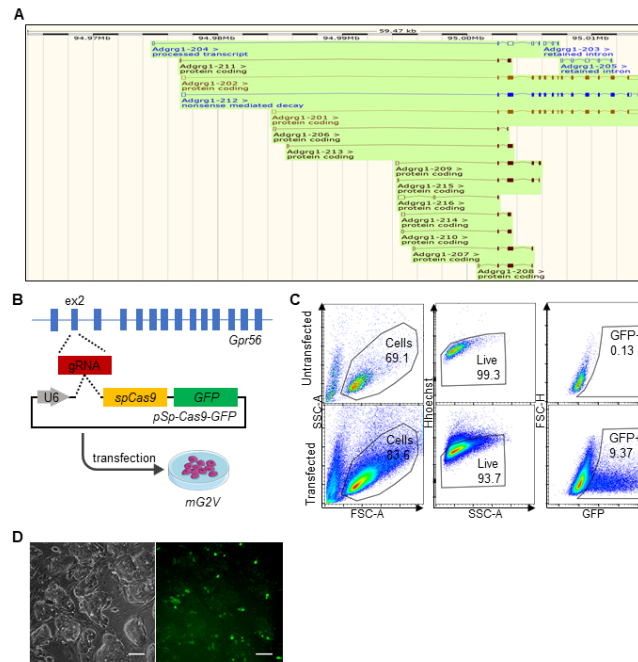

**Figure S5. Generation of *Gpr56* deleted G2V ESCs.**

**A)** *Gpr56* gene and splice isoforms as taken from Ensembl database. **B)** CRISPR/Cas9 strategy showing gRNA for *Gpr56* exon 2 and insertion in *pSp-Cas9-2A-GFP* vector used for transfection of G2V ESCs. **C)** Flow cytometric analysis of transfected and untransfected control ESCs for forward (FSC) and side scatter (SSC), viability and GFP expression. **D)** Fluorescence microscopic images of untransfected and transfected ESCs at 48 hours post-transfection. Size bar=100μm.

Figure S6

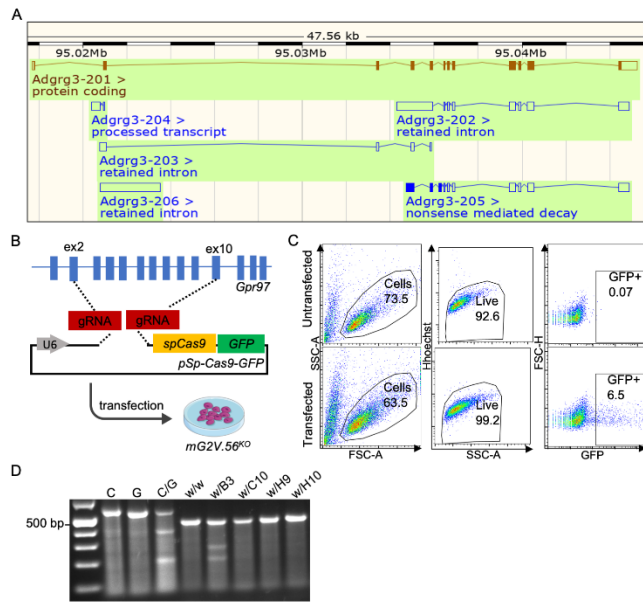

**Figure S6. Generation of *Gpr56:Gpr97* double deleted *G2V* ESCs.**

**A)** Mouse *Gpr97* gene and splice isoforms as taken from Ensemble database. **B)** CRISPR/Cas9 strategy showing gRNAs for *Gpr97* exons 2 and 10 and insertion in *pSp-Cas9-2A-GFP* vector used for transfection of *G2V.56KO* ESCs. Two rounds of transfection were performed, first with exon 2 gRNA, and after sorting for GFP+ cells a second transfection was performed with exon 10 gRNAs. **C)** Flow cytometric analysis of transfected and untransfected control ESCs for forward and side scatter, viability and GFP expression at 48 hours post-transfection. **D)** Surveyor assay on DNA from 4 CRISPR/Cas9 ESC clones (B3, C10, H9, H10) that were negative for *Gpr97* mRNA. Clone B3 shows a mismatch in *Gpr97* genomic sequence. C and G are negative and C/G is the positive control.
